# Supplementary material for: Arresting Tollens’ reagent's reaction on a glass surface as the easiest method to fabricate Ag nanocluster-based SERS substrates for glucose sensing
Source: Royal Society of Chemistry journal article supplement (doi:10.1039/d3ma00959a), 2023-12-21
Supplement: d3ma00959a1.pdf [file d3ma00959a1.pdf]

### Electronic Supplementary Information (ESI)

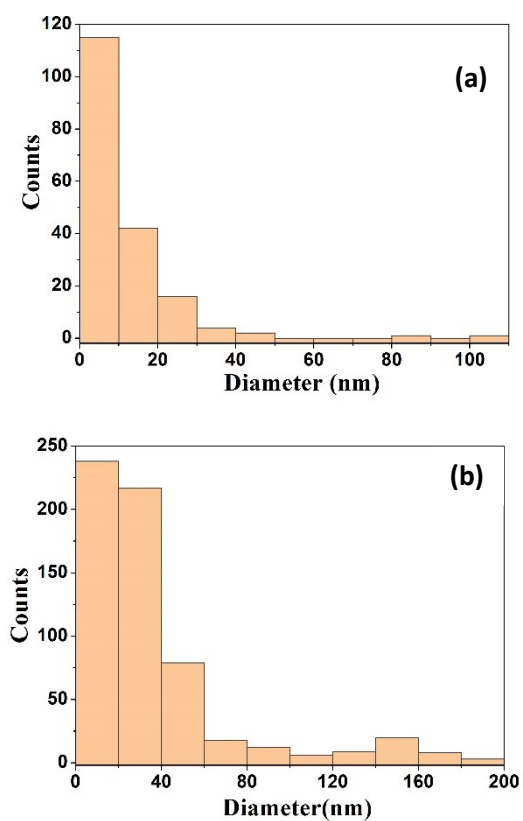

**Fig. S1.** Cluster size distribution (a) before and (b) after annealing the sample.

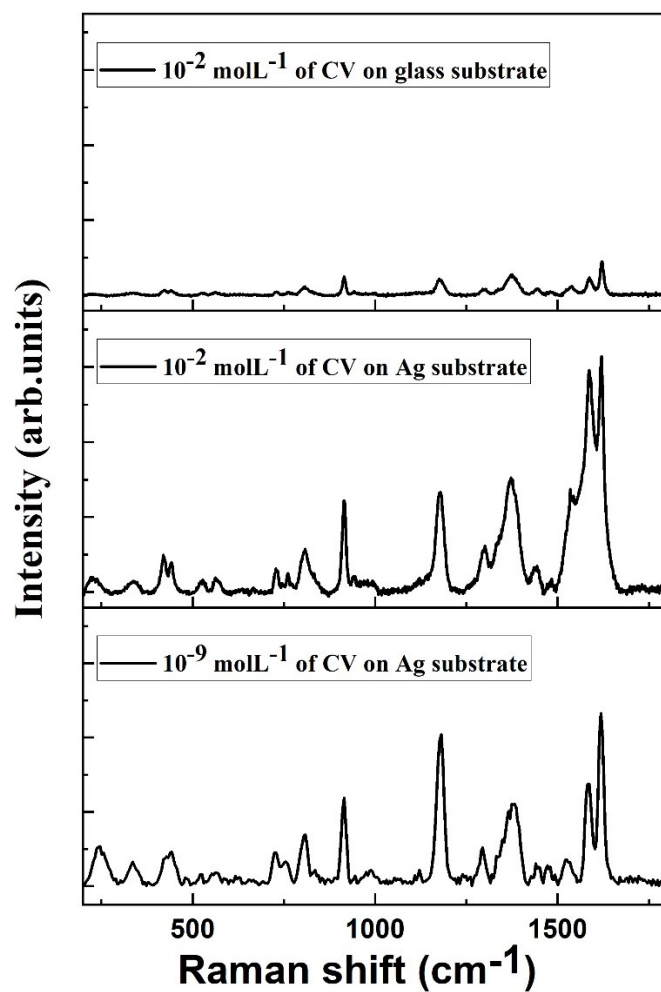

**Fig. S2.** Raman spectrum of  $10^{-9}$  molL $^{-1}$  CV attached to annealed Ag nanoclusters deposited on glass substrate in comparison to the Raman spectra of  $10^{-2}$  molL $^{-1}$  CV attached to annealed Ag nanoclusters deposited on glass substrate and directly placed on glass substrate. An enhancement factor of  $4.08 \times 10^8$  was measured in the case of  $10^{-9}$  molL $^{-1}$  CV considering 1177 cm $^{-1}$  peak of CV.
